# Supplementary material
Source: Springer Nature journal article supplement (https://www.springermedizin.de/resource/supplementary/12879_2007_640_MOESM3_ESM.pdf/9449404)

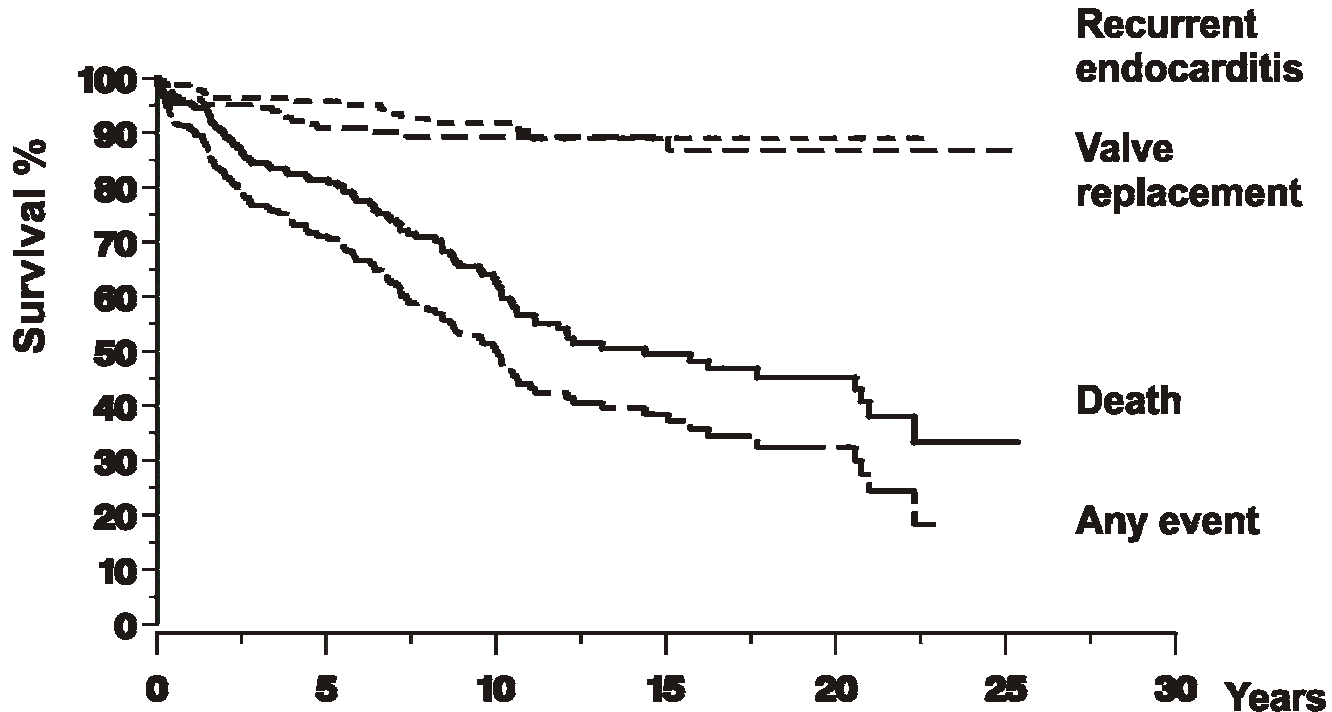

|                                   | 0   | 5   | 10 | 15 | 20 | 25 | 30 |
|-----------------------------------|-----|-----|----|----|----|----|----|
| <b>Recurrent endocarditis (n)</b> | 243 | 145 | 76 | 34 | 19 | 0  |    |
| <b>Valve replacement (n)</b>      | 243 | 137 | 71 | 36 | 18 | 1  |    |
| <b>Death (n)</b>                  | 243 | 152 | 84 | 43 | 24 | 1  |    |
| <b>Any event (n)</b>              | 243 | 133 | 67 | 31 | 15 | 0  |    |

Supplement: MOESM3 [file 9449404]
